# Supplementary material for: Prioritizing Disease Diagnosis in Neonatal Cohorts through Multivariate Survival Analysis: A Nonparametric Bayesian Approach
Source: MDPI journal article supplement (doi:10.3390/healthcare12090939), 2024-05-02
Supplement: s1 [file s1]

## **Supplementary Materials**

### **Prioritizing Disease Diagnosis in Neonatal Cohorts Through Multivariate Survival Analysis: A Nonparametric Bayesian Approach**

**Jangwon Seo<sup>1</sup>, Junhee Seok<sup>1</sup>, Yoojoong Kim<sup>2,\*</sup>**

<sup>1</sup>School of Electrical Engineering, Korea University, Seoul 02841, Republic of Korea;  
jwein307@korea.ac.kr (J.S.); jseok14@korea.ac.kr (J.S.)

<sup>2</sup> School of Computer Science and Information Engineering, The Catholic University of Korea,  
Bucheon 14662, Republic of Korea

\* Corresponding authors

Email addresses:

yoojoongkim@catholic.ac.kr,

**Table**

**Table S1.** This table illustrates the categorization of diseases into groups based on similarities, as defined by the major classifications of the ICD-10. Supplementary Table S1 presents the disease codes, incidence rates, and descriptions for the 27 disease categories classified according to the ICD-10 major classification.

| ICD (27) | Diagnosis rate (%) | Description                                                                                         |
|----------|--------------------|-----------------------------------------------------------------------------------------------------|
| A00-A99  | 82.6%              | Certain infectious and parasitic diseases                                                           |
| B00-B99  | 78.35%             |                                                                                                     |
| C00-D48  | 0.26               | Malignant neoplasms                                                                                 |
| D50-D-89 | 9.21               | Diseases of the blood and blood-forming organs and certain disorders involving the immune mechanism |
| E00-E90  | 5.61               | Endocrine, nutritional and metabolic diseases                                                       |
| F00-F99  | 8.22               | Mental and behavioural disorders                                                                    |
| G00-G99  | 7.12               | Diseases of the nervous system                                                                      |
| H00-H59  | 86.39              | Diseases of the eye and adnexa                                                                      |
| H60-H95  | 81.47              | Diseases of the ear and mastoid process                                                             |
| I00-I99  | 3.58               | Diseases of the circulatory system                                                                  |
| J00-J99  | 99.87              | Diseases of the respiratory system                                                                  |
| K00-K93  | 82.07              | Diseases of the digestive system                                                                    |
| L00-L99  | 92.76              | Diseases of the skin and subcutaneous tissue                                                        |
| M00-M99  | 23.57              | Diseases of the musculoskeletal system and connective tissue                                        |
| N00-N99  | 29.48              | Diseases of the genitourinary system                                                                |
| O00-O99  | 0.06               | Pregnancy, childbirth and the puerperium                                                            |
| P00-P96  | 9.79               | Certain conditions originating in the perinatal period                                              |
| Q00-Q99  | 8.34               | Congenital malformations, deformations and chromosomal abnormalities                                |
| R00-R99  | 61.80              | Symptoms, signs and abnormal clinical and laboratory findings, not elsewhere classified             |
| S00-S99  | 66.21              | Injury, poisoning and certain other consequences of external causes                                 |
| T00-T98  | 34.36              |                                                                                                     |
| U00-U85  | 0                  | Codes for special purposes                                                                          |
| V01-V99  | 0                  | External causes of morbidity and mortality                                                          |

|         |      |                                                                    |
|---------|------|--------------------------------------------------------------------|
| W00-W99 | 0.37 |                                                                    |
| X00-X99 | 0.07 |                                                                    |
| Y00-Y98 | 0.06 |                                                                    |
| Z00-Z99 | 8.39 | Factors influencing health status and contact with health services |

**Table S2.** Top six frequent sequences of events based on the precedence and sequence analysis score function for the observed 4343 patients. The most probable sequence order with the least score was respiratory, skin, infectious, digestive, ear, eye, and, injury diseases. Sequences with scores not more than 2% higher than the best score were above the borderline as valid sequences.

| Event Sequence                                       | Score | Rise Rate |
|------------------------------------------------------|-------|-----------|
| Respiratory→Skin→Infectious→Digestive→Ear→Eye→Injury | 6.85  | 0.00      |
| Respiratory→Infectious→Skin→Digestive→Ear→Eye→Injury | 6.89  | 0.51      |
| Respiratory→Skin→Infectious→Ear→Digestive→Eye→Injury | 6.89  | 0.51      |
| Respiratory→Infectious→Skin→Ear→Digestive→Eye→Injury | 6.92  | 1.01      |
| Respiratory→Skin→Infectious→Digestive→Eye→Ear→Injury | 6.98  | 1.79      |
| Respiratory→Skin→Infectious→Digestive→Ear→Injury→Eye | 7.01  | 2.29      |

## Figures

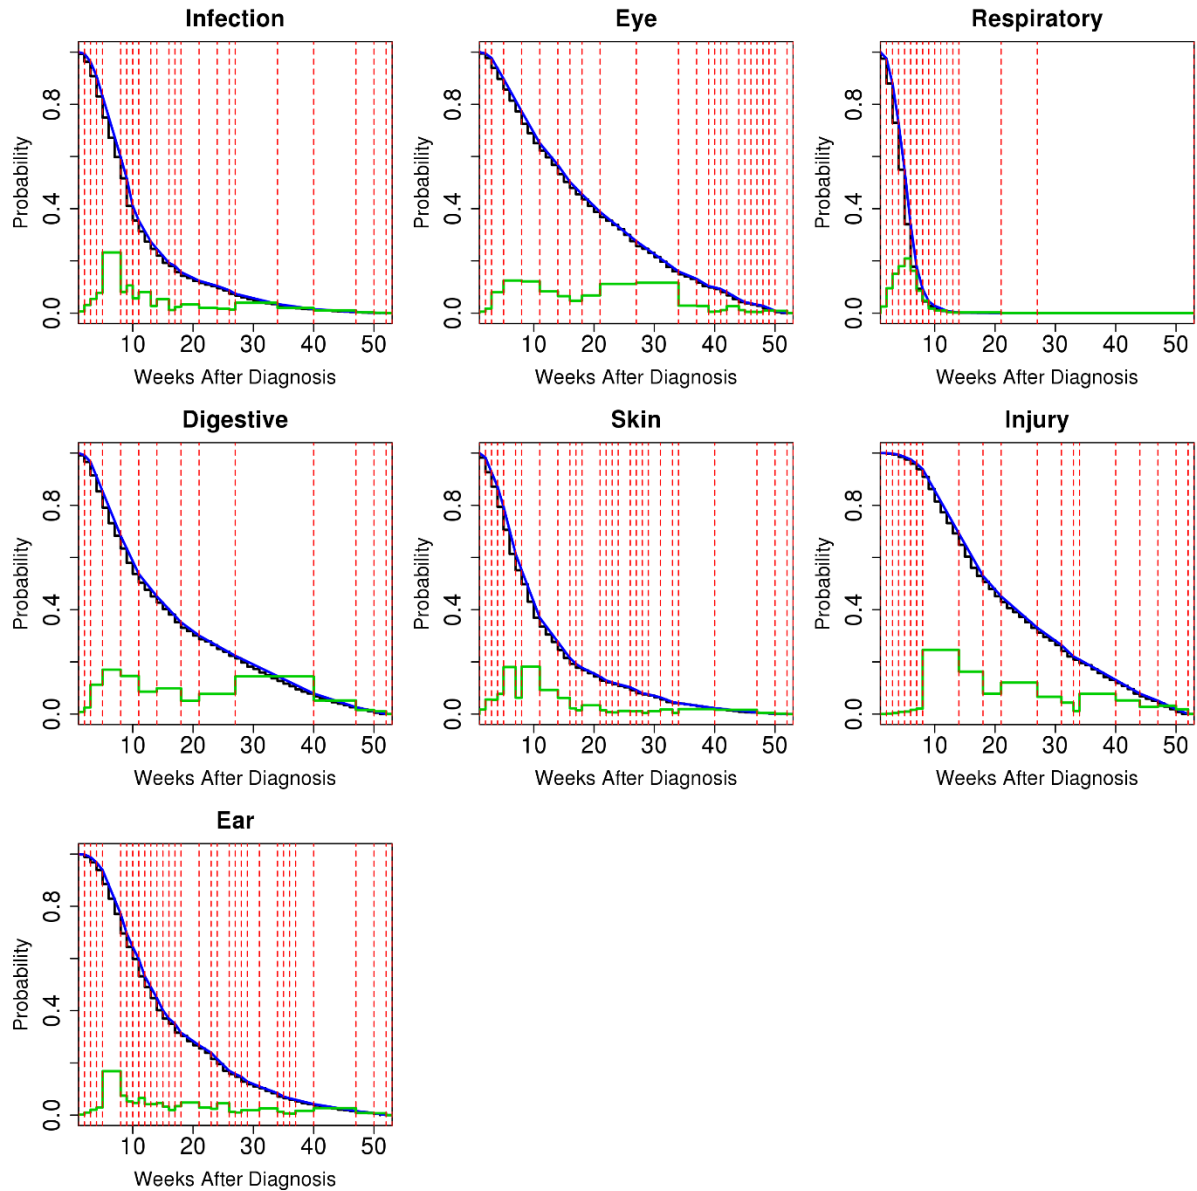

**Figure S1.** Univariate analyses of single events for the observed 4343 patients. The probability of the event occurrence was estimated for each disease diagnosis event, by CEPA (blue) and the well-known Kaplan–Meier (black) method. The dashed red vertical lines represent the CEPA partitions within which the probability density was expected to be uniform. The green lines represent the probability masses assigned to the CEPA partitions.

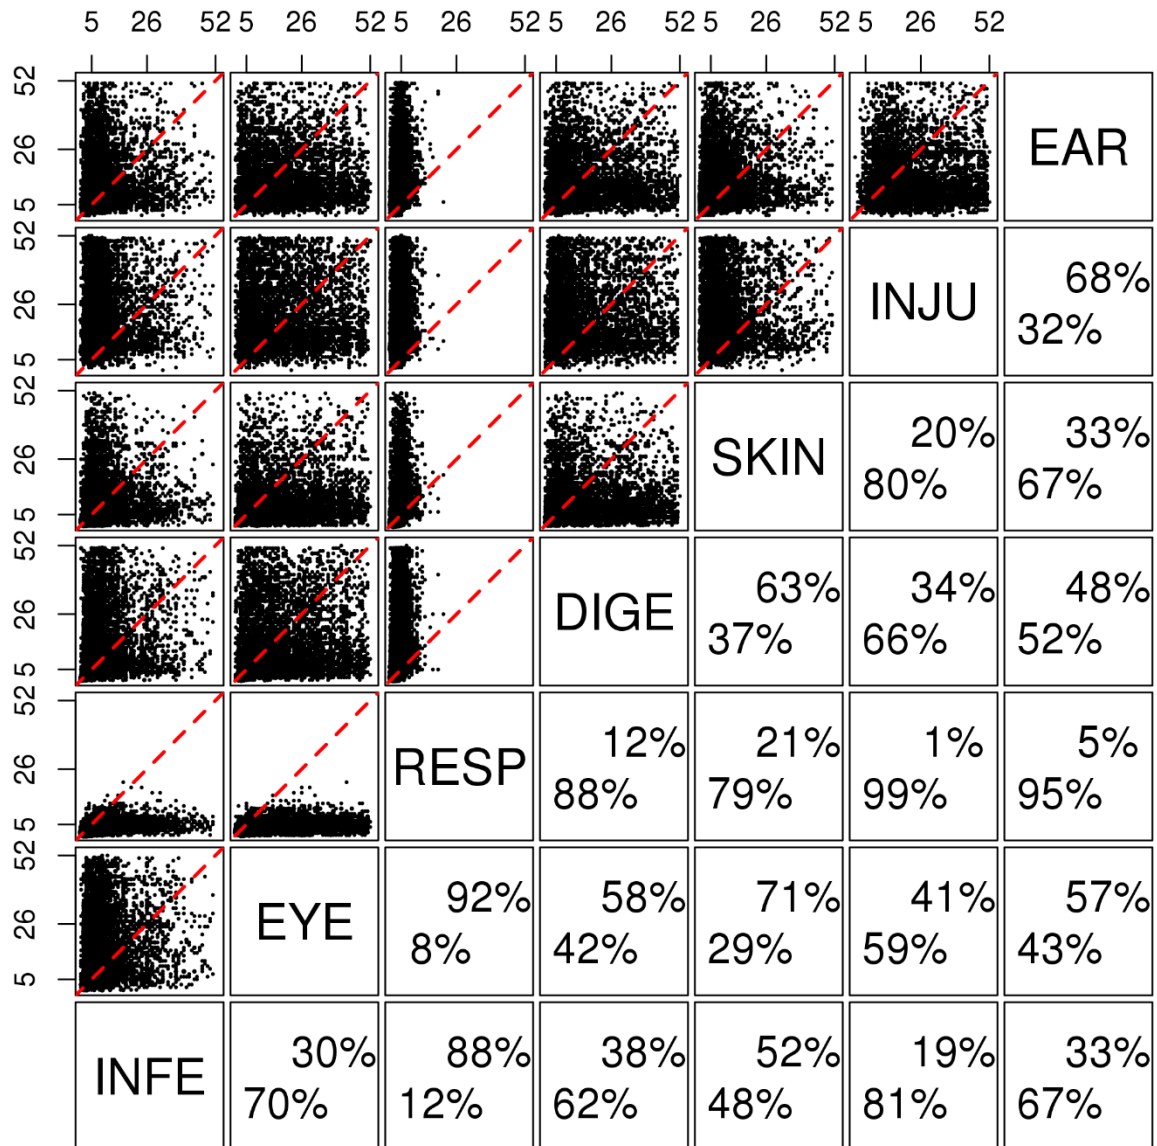

**Figure S2.** Pairwise precedence of the disease diagnosis events for the observed 4343 patients. A joint distribution of bivariate time-to-events was estimated by CEPA for each pair of events. The considered events were the diagnoses of infectious disease (INFE), eye disease (EYE), respiratory disease (RESP), digestive disease (DIGE), skin disease (SKIN), injury (INJU), and ear disease (EAR). Each top-left panel shows the observed or censored days of bottom and right-side events. Each bottom-right panel shows the precedence chance of the top-side to the left-side events (top-right %) and that of the opposite case (bottom-left %) when both events occurred at different times. For example, respiratory diseases preceded digestive diseases and were diagnosed 88% of the time.
